# Supplementary material for: Cardiovascular Disease Outcomes Associated with Three Major Inflammatory Dermatologic Diseases: A Propensity-Matched Case Control Study
Source: PubMed Central journal article supplement — Dermatol Ther (Heidelb). 2016 Sep 22;6(4):649–58. doi: 10.1007/s13555-016-0144-3 (PMC5120633; doi:10.1007/s13555-016-0144-3), 2016-09-22
Supplement: 13555_2016_144_MOESM1_ESM.pdf [file 13555_2016_144_MOESM1_ESM.pdf]

**Supplementary Table 1: CPT codes used to identify cardiovascular disease**

| <b>CPT Codes</b>                                             |                                                                                                      |
|--------------------------------------------------------------|------------------------------------------------------------------------------------------------------|
| 33140, 33141                                                 | Transmyocardial revascularization                                                                    |
| 33202 33203                                                  | Placement of epicardial leads                                                                        |
| 33207 33208, 33210-<br>33213 33216 33217<br>33240 33249      | Insertion of pacemaker/implantable defibrillators                                                    |
| 33250 33251 33254-<br>33259 33261 33266                      | Surgical ablation of arrhythmogenic foci                                                             |
| 33282                                                        | Implantable loop recorder                                                                            |
| 33300 33305 33310<br>33315 33320- 33322<br>33330 33332 33335 | Procedures for injury of the heart/aorta/great vessels                                               |
| 33361-33369 33400-<br>33465 33470-33478                      | Valve Procedures                                                                                     |
| 1060F                                                        | Documentation of permanent or persistent or paroxysmal atrial fibrillation                           |
| 33621                                                        | Repair aberrant heart anatomy                                                                        |
| 37215 37216                                                  | Stenting of Carotid artery                                                                           |
| 37221 37223 37226<br>37227 37230 37231<br>37234 37235        | Endovascular revascularization                                                                       |
| 92928 92929 92933<br>92934 92937 92938<br>92941 92943 92944  | Emergency Cardiac Procedures- Percutaneous angioplasty                                               |
| 33510-33519 33521-<br>33523 33530 33533-<br>33536            | Coronary Artery Bypass (venous ± arterial grafts, reoperative graft procedure, arterial grafts)      |
| 33572                                                        | Endarterectomy with coronary artery bypass graft                                                     |
| 4110F                                                        | Internal mammary artery graft performed for primary, isolated coronary artery bypass graft procedure |
| 4561F                                                        | Patient has a coronary artery stent                                                                  |
